# Supplementary material for: EpCAM aptamer mediated cancer cell specific delivery of EpCAM siRNA using polymeric nanocomplex
Source: PubMed Central journal article supplement (PMC4307906; doi:10.1186/s12929-014-0108-9), 2015-01-09

# Supplementary Figure 1

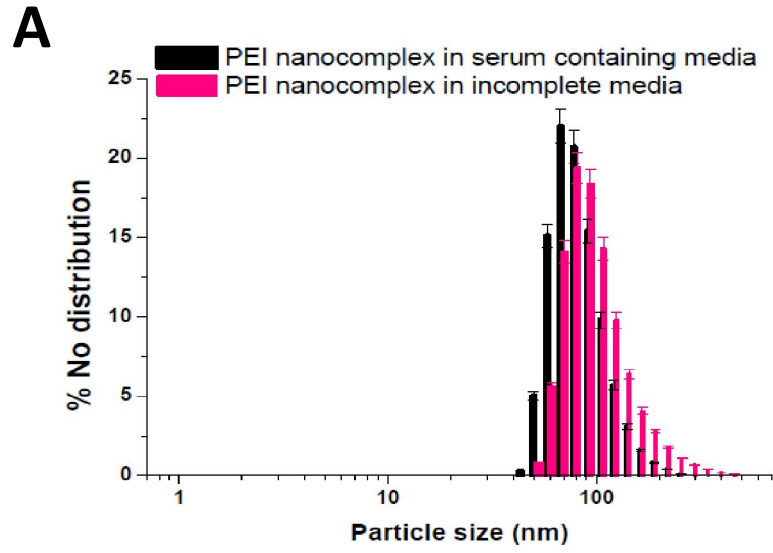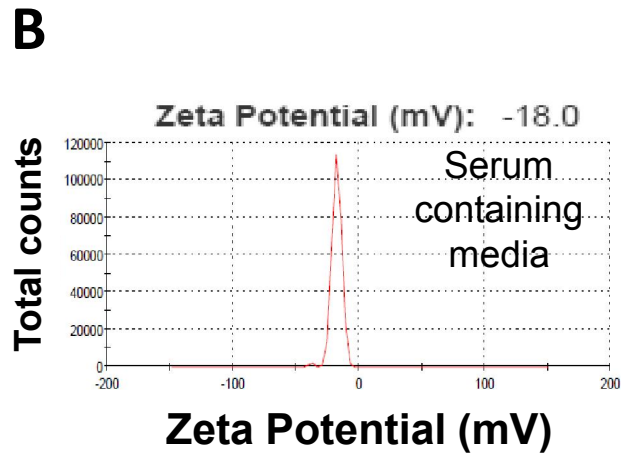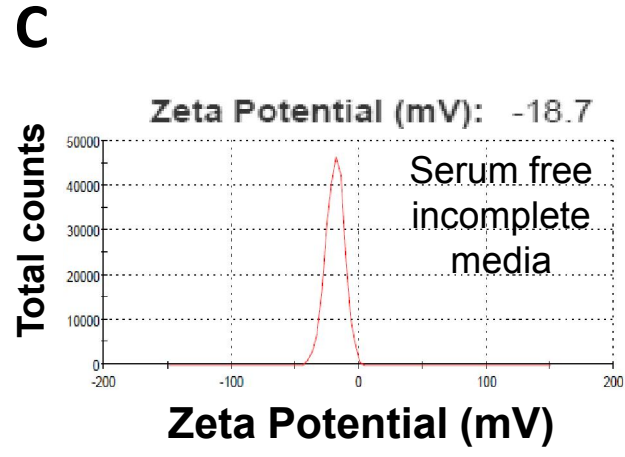

## Supplementary Figure 2

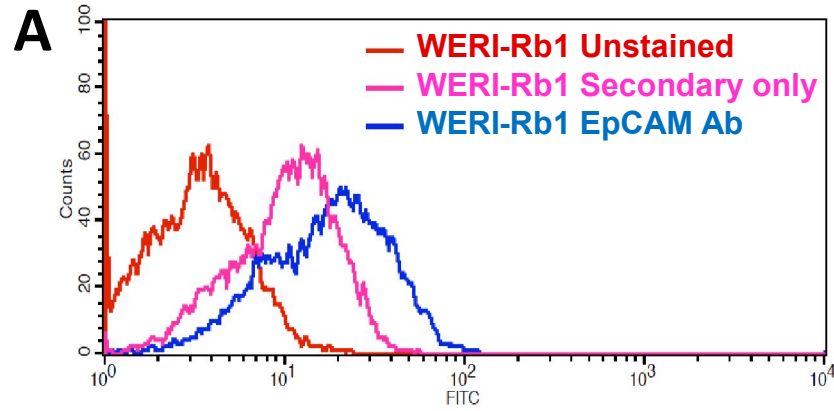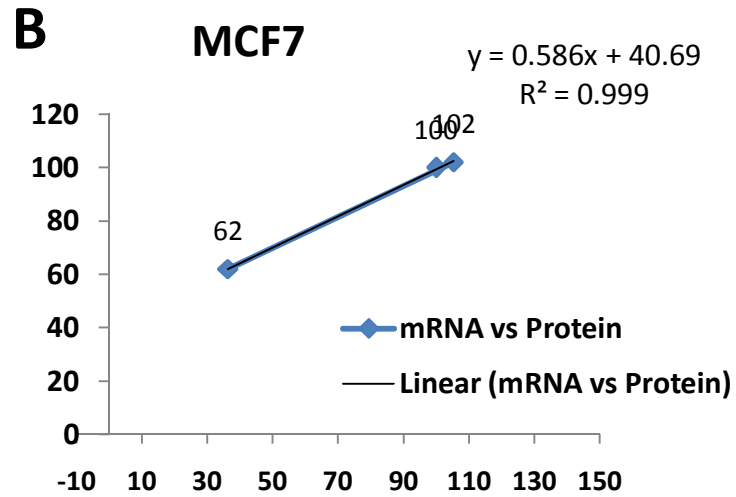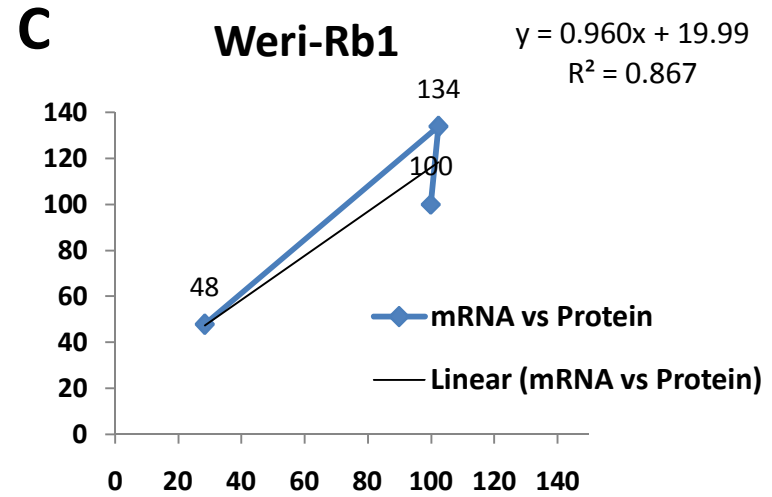

Supplement: 12929_2014_108_MOESM2_ESM.pdf [file 12929_2014_108_MOESM2_ESM.pdf]
